# Supplementary material
Source: PubMed Central journal article supplement (PMC4634716)
Supplement: jp5b05190_si_001.pdf [file jp5b05190_si_001.pdf]

# Supporting Information: Stem-loop V of Varkud Satellite RNA Exhibits Characteristics of the Mg<sup>2+</sup> Bound Structure in the Presence of Monovalent Ions

*Christina Bergonzo<sup>1</sup>, Kathleen B. Hall<sup>2</sup>, Thomas E. Cheatham III<sup>1,\*</sup>*

<sup>1</sup> Department of Medicinal Chemistry, College of Pharmacy, University of Utah, Salt Lake City,  
Utah 84112, United States

<sup>2</sup> Department of Biochemistry and Molecular Biophysics, Washington University School of  
Medicine, St. Louis, Missouri 63110, United States

\* To whom correspondence should be addressed. Tel: 1 (801) 587-9652; Email: tec3@utah.edu

## Contents

|                                                                                                                                                                                                  |    |
|--------------------------------------------------------------------------------------------------------------------------------------------------------------------------------------------------|----|
| <b>Supporting Figure 1: Flow chart for MD simulations</b> .....                                                                                                                                  | 3  |
| <b>Supporting Figure 2:</b> Heavy atom RMSDs for each of ten independent 250 ns simulations of SLV + 50 mM NaCl, starting from NMR Model 1. ....                                                 | 4  |
| <b>Supporting Figure 3:</b> U-turn Characteristics of SLV in 50 mM NaCl. ....                                                                                                                    | 5  |
| <b>Supporting Figure 4:</b> Loop RMSD to SLV MgFree starting structure. ....                                                                                                                     | 6  |
| <b>Supporting Figure 5:</b> Major groove widths during initial MgFree simulations with 50 mM NaCl<br>.....                                                                                       | 7  |
| <b>Supporting Table 1:</b> Alpha torsion angles in RNA U-turn hairpin loops.....                                                                                                                 | 8  |
| <b>Supporting Table 2:</b> Clusters' r <sup>6</sup> averaged values for MgBound NOE violations .....                                                                                             | 9  |
| <b>Supporting Figure 6:</b> Localization of top 10% of Mg <sup>2+</sup> ion density (shown in green) of 2 <sup>nd</sup> most populated cluster in the divalent ion environment simulations ..... | 10 |

|                                                                                                                                          |    |
|------------------------------------------------------------------------------------------------------------------------------------------|----|
| <b>Supporting Figure 7:</b> Closest Mg <sup>2+</sup> to Binding Sites 1-4 in MgFree + 40 mM MgCl <sub>2</sub> Simulations .....          | 11 |
| <b>Supporting Table 3:</b> Percent Occupancy of atoms designated as Binding Sites 1-4 from Campbell et al. 2006 .....                    | 12 |
| <b>Supporting Script 1:</b> Clustering command for analysis of restrained re-refined SLV simulations. ....                               | 13 |
| <b>Supporting Script 2:</b> Input file for simulated annealing .....                                                                     | 13 |
| <b>Supporting Script 3:</b> Cpptraj command to separate MgBound and MgFree SLV simulation data < 2.5 Å RMSD to MgBound loop.....         | 13 |
| <b>Supporting Script 4:</b> Clustering command for analysis of MgBound and MgFree SLV simulation data < 2.5 Å RMSD to MgBound loop ..... | 14 |
| <b>Supporting Script 5:</b> Grid density analysis.....                                                                                   | 14 |
| <b>Supporting Script 6:</b> Hbond analysis.....                                                                                          | 14 |

## Supporting Figure 1: Flow chart for MD simulations

### 3. Production Dynamics for each SLV RNA (MgFree, MgBound) in each solvent condition (40 mM MgCl<sub>2</sub>, 50 mM NaCl)

| MgBound + 40 mM MgCl <sub>2</sub>                                                                    | MgBound + 50 mM NaCl                                                                                 |
|------------------------------------------------------------------------------------------------------|------------------------------------------------------------------------------------------------------|
| Model 1 RNA coordinates from PDBID 1YN2                                                              |                                                                                                      |
| AMBER ff12                                                                                           |                                                                                                      |
| TIP3P water, 8 Mg <sup>2+</sup> ions to neutralize charge, 5 MgCl <sub>2</sub> molecules for [40 mM] | TIP3P water, 16 Na <sup>+</sup> ions to neutralize charge, 6 NaCl molecules for [50 mM]              |
| Randomize ion positions x 10                                                                         |                                                                                                      |
| Minimize and equilibrate 10 copies                                                                   |                                                                                                      |
| Production dynamics: 250 ns per copy                                                                 |                                                                                                      |
| MgFree + 50 mM NaCl                                                                                  | MgFree + 40 mM MgCl <sub>2</sub>                                                                     |
| Final minimized coords from new ensemble                                                             |                                                                                                      |
| AMBER ff12                                                                                           |                                                                                                      |
| TIP3P water, 16 Na <sup>+</sup> ions to neutralize charge, 6 NaCl molecules for [50 mM]              | TIP3P water, 8 Mg <sup>2+</sup> ions to neutralize charge, 5 MgCl <sub>2</sub> molecules for [40 mM] |
| Randomize ion positions                                                                              |                                                                                                      |
| Minimize and equilibrate each model                                                                  |                                                                                                      |
| Production dynamics: 250 ns per model                                                                |                                                                                                      |

### 1. Initial MgFree Simulations

| MgFree + 50 mM NaCl                                                                     |
|-----------------------------------------------------------------------------------------|
| Model 1 coordinates from PDBID 1TBK                                                     |
| AMBER ff12                                                                              |
| TIP3P water, 16 Na <sup>+</sup> ions to neutralize charge, 6 NaCl molecules for [50 mM] |
| Randomize ion positions x 10                                                            |
| Minimize and equilibrate 10 copies                                                      |
| Production dynamics: 250 ns per copy                                                    |

### 2. NMR Re-refinement of MgFree Structure

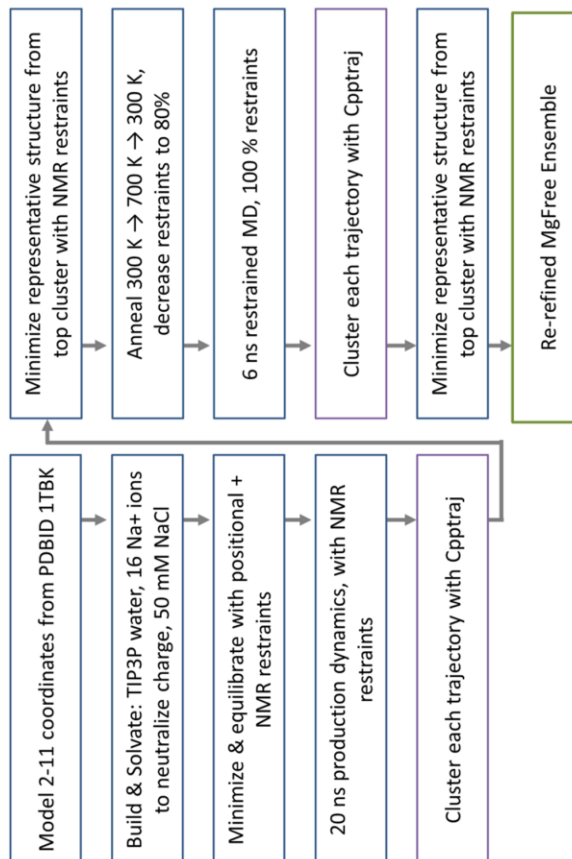

## Supporting Figure 2: Heavy atom RMSDs for each of ten independent 250 ns simulations of SLV + 50 mM NaCl, starting from NMR Model 1.

Solid lines are 1000 step running averages. Un-averaged data is shown in grey. Heavy atom RMSDs for All Residues (top), Loop Residues (middle), and Stem Residues (bottom) are shown.

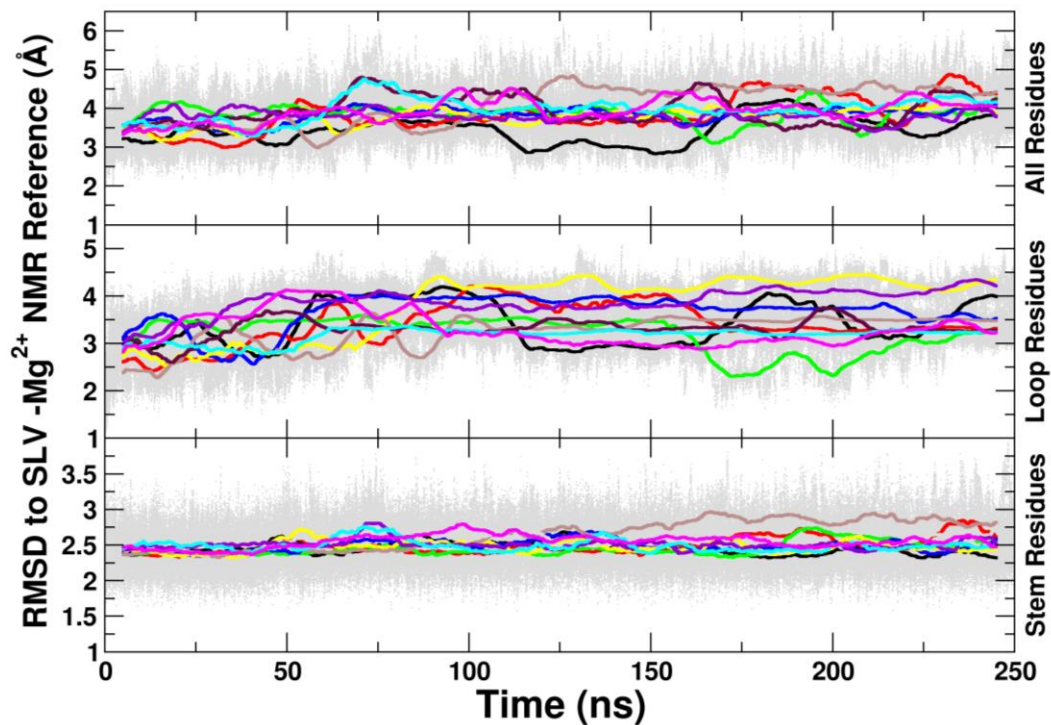

## Supporting Figure 3: U-turn Characteristics of SLV in 50 mM NaCl.

Solid lines are 1000 step running averages. Un-averaged data is shown in grey.

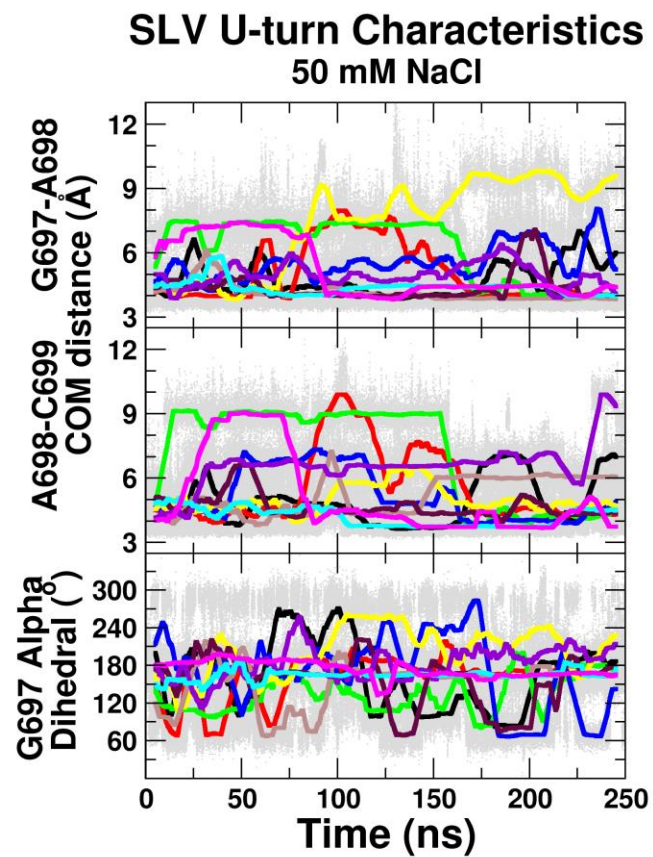

## Supporting Figure 4: Loop RMSD to SLV MgFree starting structure.

MgFree starting structure with net neutralizing Na<sup>+</sup> is shown in black. MgFree starting structure with net neutralizing Na<sup>+</sup> and restrained G697 alpha is shown in green.

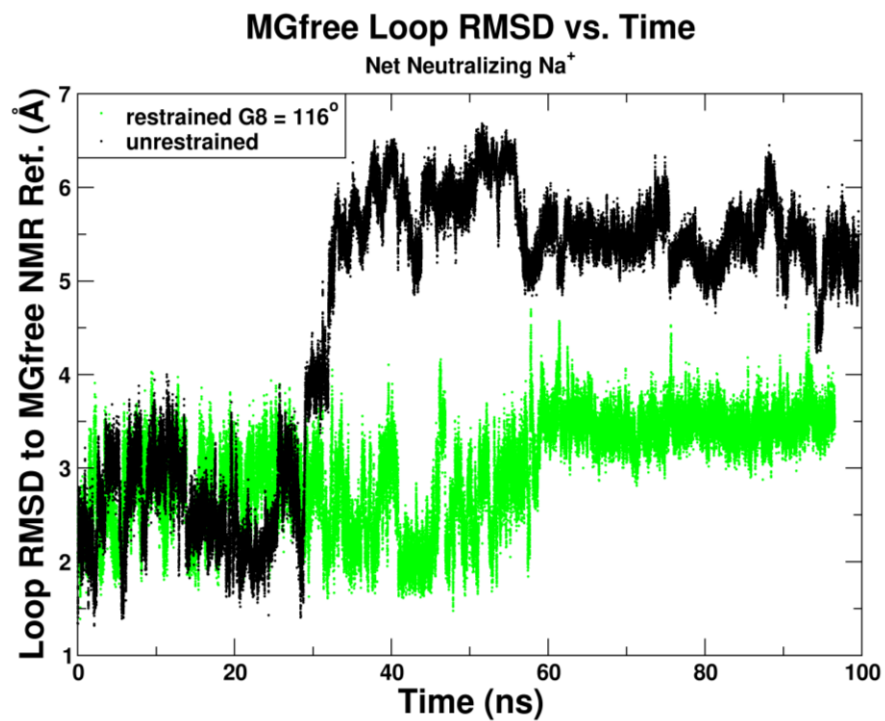

**Supporting Figure 5:** Major groove widths during initial MgFree simulations with 50 mM NaCl

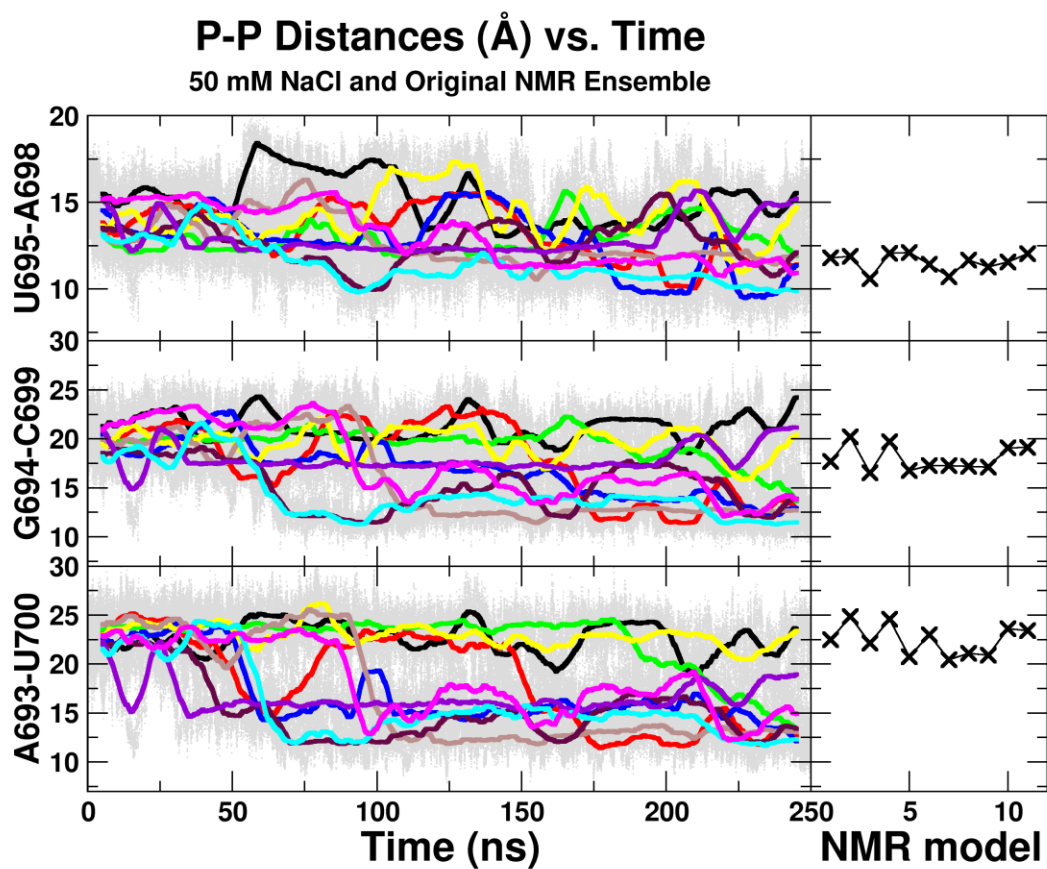

## Supporting Table 1: Alpha torsion angles in RNA U-turn hairpin loops

| System                       | U-turn | PDB  | Loop sequence                                                      | alpha               | Loop-closing base pair | Method             |
|------------------------------|--------|------|--------------------------------------------------------------------|---------------------|------------------------|--------------------|
| Varkud SLV -Mg <sup>2+</sup> | Yes    | 1TBK | UGACU                                                              | 116° ±7°            | U:A                    | NMR <sup>b</sup>   |
| Varkud SLV +Mg <sup>2+</sup> | Yes    | 1YN2 | UGACU                                                              | 167 ±34°            | U:A                    | NMR <sup>b</sup>   |
| 690 loop yeast 16S rRNA      | Yes    | 1FHK | UGAA                                                               | 172° ±5°            | Sheared G:A            | NMR <sup>c</sup>   |
| HIV A-rich Stem-loop         | Yes    | 1BJV | UAAA                                                               | 135° ±99°           | Sheared G:A            | NMR <sup>d</sup>   |
| Stem-loop IIA U2 snRNA       | Yes    | 2U2A | UAAC                                                               | 170.6°              | Sheared G:A            | NMR <sup>e</sup>   |
| Yeast tRNA <sup>phe</sup>    | Yes    | 1EHZ | A <sup>OMe</sup> CU <sup>OMe</sup> GAAWA <sub>ψ</sub> <sup>a</sup> | 171.1°              | C:W                    | X-ray <sup>f</sup> |
| Yeast rRNA tetraloop         | No     | 1AFX | UGAA                                                               | U-G 300°<br>G-A 55° | C:G                    | NMR <sup>g</sup>   |

<sup>a</sup>Abbreviations: <sup>OMe</sup>C: 2'-O-methyl-C; <sup>OMe</sup>G: 2'-O-methyl G; W wybutasine; <sub>ψ</sub> pseudouridine. <sup>b</sup>Campbell and Legault, 2005. <sup>c</sup>Morosyuk et al., 2001. <sup>d</sup>Puglisi and Puglisi, 1998. <sup>e</sup>Stallings and Moore, 1997. <sup>f</sup>Shi and Moore, 2000. <sup>g</sup>Butcher et al., 1999.

- (1) Campbell, D. O.; Legault, P. Nuclear Magnetic Resonance Structure of the Varkud Satellite Ribozyme Stem-Loop V RNA and Magnesium-Ion Binding from Chemical-Shift Mapping. *Biochemistry* **2005**, *44*, 4157–4170.
- (2) Morosyuk, S. V.; Cunningham, P. R.; SantaLucia, J. Structure and Function of the Conserved 690 Hairpin in Escherichia Coli 16 S Ribosomal RNA. II. NMR Solution Structure. *J. Mol. Biol.* **2001**, *307*, 197–211.
- (3) Puglisi, E. V.; Puglisi, J. D. HIV-1 A-Rich RNA Loop Mimics the tRNA Anticodon Structure. *Nat. Struct. Biol.* **1998**, *5*, 1033–1036.
- (4) Stallings, S. C.; Moore, P. B. The Structure of an Essential Splicing Element: Stem Loop IIA from Yeast U2 snRNA. *Structure* **1997**, *5*, 1173–1185.
- (5) Shi, H.; Moore, P. B. The Crystal Structure of Yeast Phenylalanine tRNA at 1.93 Å Resolution: A Classic Structure Revisited. *RNA* **2000**, *6*, 1091–1105.
- (6) Butcher, S. E.; Allain, F. H.; Feigon, J. Solution Structure of the Loop B Domain from the Hairpin Ribozyme. *Nat. Struct. Biol.* **1999**, *6*, 212–216.



**Supporting Table 2: Clusters'  $r^6$  averaged values for MgBound NOE violations**

|                     | NOE                | Divalent Ions,<br>Top Cluster | Monovalent Ions,<br>Top Cluster | Divalent Ions,<br>2nd Cluster |
|---------------------|--------------------|-------------------------------|---------------------------------|-------------------------------|
| <b>Strong NOEs</b>  | :699@H4' -:699@H3' | 3.0164                        | 2.9966                          | 3.0108                        |
| <b>1.8-3</b>        | :697@H4' -:697@H3' | 3.0053                        | 2.997                           | 2.9983                        |
|                     | :696@H4' -:696@H3' | 3.0147                        | 2.9999                          | 3.0068                        |
|                     | :698@H3' -:698@H8  | 2.9353                        | 3.4673                          | 2.9153                        |
|                     | :696@H1' -:699@H5  | 2.7024                        | 4.458                           | 4.2819                        |
|                     | :696@H2' -:698@H8  | 2.6593                        | 3.2372                          | 2.9893                        |
| <b>Medium NOEs</b>  | :696@H1' -:701@H2  | 4.1875                        | 5.0432                          | 4.9356                        |
| <b>1.8-4.1</b>      | :699@H2' -:700@H6  | 4.1788                        | 4.98                            | 4.4771                        |
|                     | :700@H3' -:700@H6  | 4.4508                        | 3.9206                          | 4.3991                        |
|                     | :698@H2' -:699@H1' | 3.3934                        | 3.541                           | 4.3702                        |
|                     | :697@H2' -:697@H8  | 4.1629                        | 4.2032                          | 4.0412                        |
| <b>Weak NOEs</b>    | :700@H5' -:701@H8  | 5.8029                        | 5.4213                          | 5.6661                        |
| <b>1.8-5.5</b>      | :699@H3' -:700@H5  | 6.4325                        | 6.6634                          | 6.5658                        |
|                     | :699@H3' -:700@H6  | 5.5373                        | 5.5862                          | 5.5466                        |
|                     | :696@H2' -:699@H5  | 4.5356                        | 5.657                           | 5.8133                        |
|                     | :696@H2' -:698@H3' | 4.678                         | 5.7503                          | 4.9862                        |
|                     | :695@H4' -:696@H6  | 5.5079                        | 6.1696                          | 5.9121                        |
|                     | :695@H1' -:696@H6  | 5.3343                        | 5.7325                          | 5.3803                        |
| <b>V. Weak NOEs</b> | :698@H5' -:699@H5  | 7.7272                        | 4.1343                          | 6.4342                        |
| <b>1.8-7.0</b>      | :696@H4' -:699@H5  | 5.521                         | 7.4328                          | 7.3851                        |

**Supporting Figure 6:** Localization of top 10% of  $\text{Mg}^{2+}$  ion density (shown in green) of 2<sup>nd</sup> most populated cluster in the divalent ion environment simulations

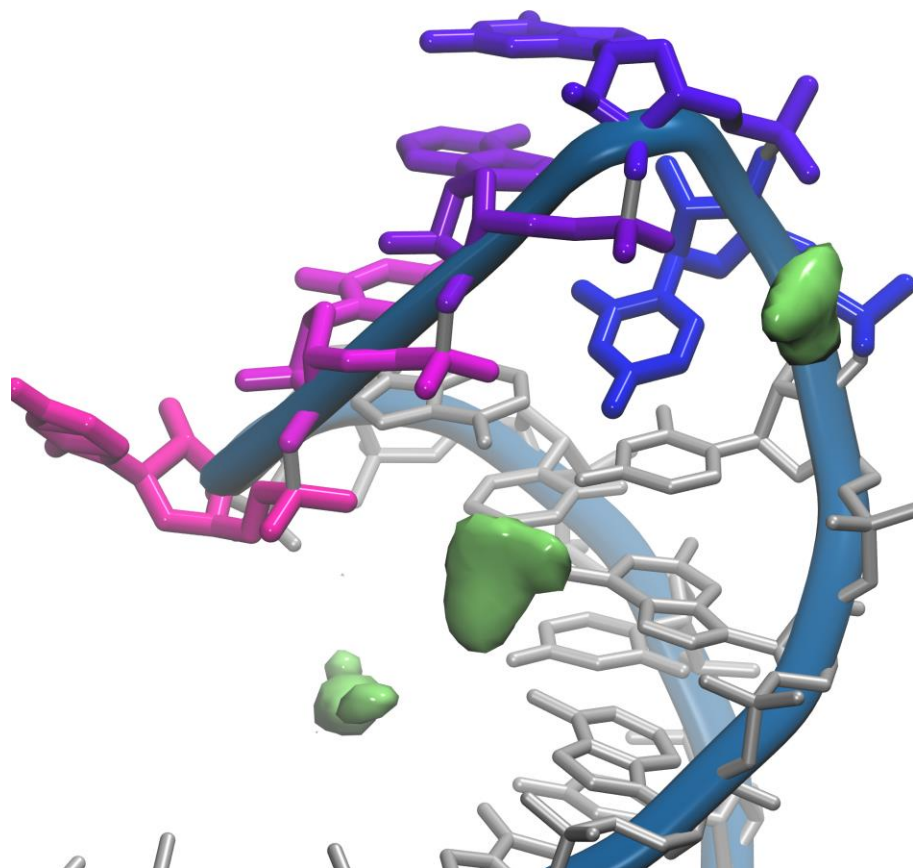

## Supporting Figure 7: Closest Mg<sup>2+</sup> to Binding Sites 1-4 in MgFree + 40 mM MgCl<sub>2</sub> Simulations

Four out of ten MgFree + 40 mM MgCl<sub>2</sub> simulations sample the MgBound conformation. Below is the time dependent plots of closest Mg<sup>2+</sup> ion to the centers of mass of binding sites 1 (black), 2 (red), 3 (cyan), and 4 (blue) for each of these four simulations. The loop RMSD to the MgBound reference is shown for each simulation in brown. The scales for distance and RMSD are the same.

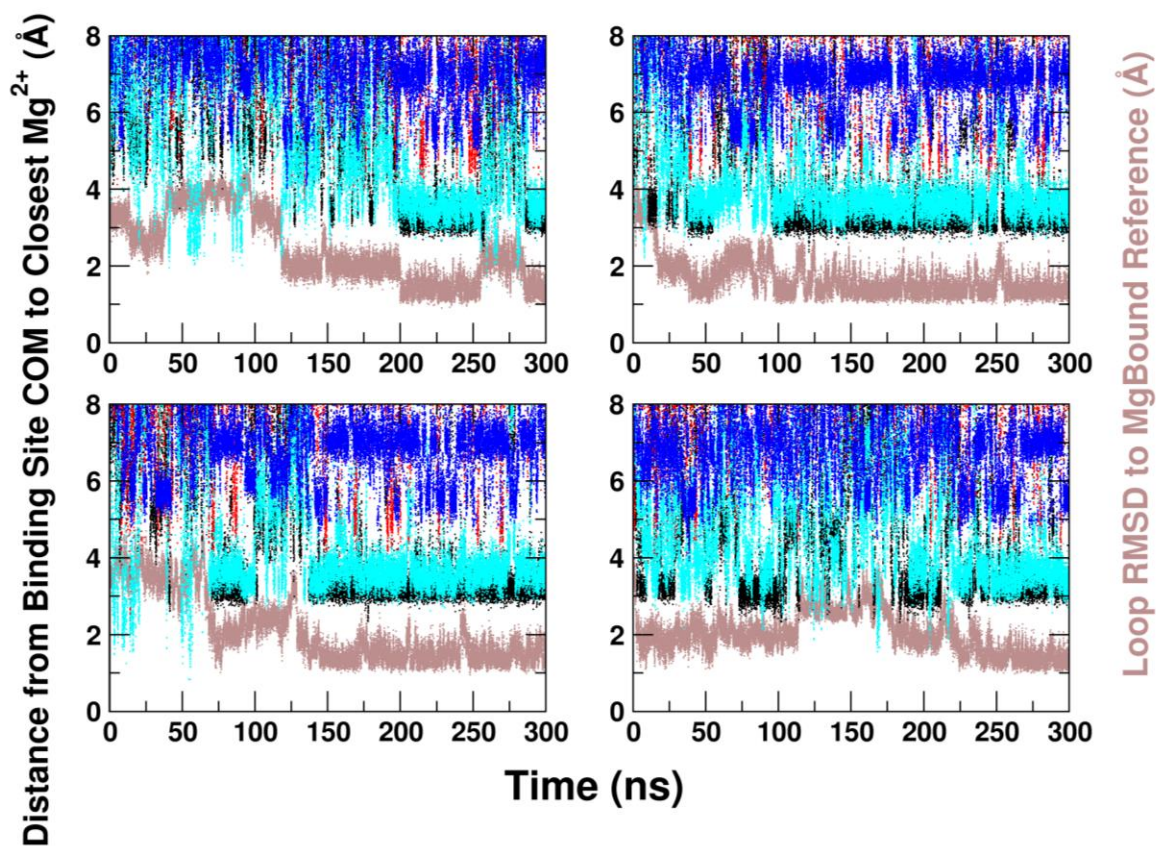

**Supporting Table 3: Percent Occupancy of atoms designated as Binding Sites 1-4 from Campbell et al. 2006**

| Binding Site | Residue                | Atom                   | Divalent Ions, Top Cluster |              | Divalent Ions, 2 <sup>nd</sup> Cluster |              |
|--------------|------------------------|------------------------|----------------------------|--------------|----------------------------------------|--------------|
|              |                        |                        | Occupancy (%)              | Avg Dist (Å) | Occupancy (%)                          | Avg Dist (Å) |
| <b>1</b>     | <b>U<sub>696</sub></b> | <b>OP1</b>             | 1.52                       | 3.84         | 7.32                                   | 3.83         |
|              | <b>U<sub>696</sub></b> | <b>OP2</b>             | 43.35                      | 3.75         | 15.13                                  | 3.80         |
|              | <b>U<sub>696</sub></b> | <b>O5'</b>             | 0.01                       | 3.96         | 0.08                                   | 3.93         |
|              | <b>G<sub>697</sub></b> | <b>OP1</b>             | 3.05                       | 3.84         | 2.91                                   | 3.85         |
|              | <b>G<sub>697</sub></b> | <b>O3'</b>             | 0.01                       | 3.92         | 0.03                                   | 3.94         |
|              | <b>A<sub>698</sub></b> | <b>OP1</b>             | 7.85                       | 3.87         | 6.60                                   | 3.85         |
|              | <b>A<sub>698</sub></b> | <b>OP2</b>             | 32.11                      | 3.87         | 18.6                                   | 3.85         |
|              | <b>2</b>               | <b>U<sub>696</sub></b> | <b>O2'</b>                 | 0.05         | 3.88                                   | 0.03         |
|              | <b>G<sub>697</sub></b> | <b>N7</b>              | 0.62                       | 3.87         | 0.38                                   | 3.87         |
|              | <b>A<sub>698</sub></b> | <b>N7</b>              | ---                        | ---          | ---                                    | ---          |
| <b>3</b>     | <b>U<sub>695</sub></b> | <b>O4</b>              | 16.92                      | 3.86         | 20.45                                  | 3.83         |
|              | <b>U<sub>696</sub></b> | <b>O4</b>              | 5.67                       | 3.84         | 7.32                                   | 3.83         |
|              | <b>C<sub>699</sub></b> | <b>OP1</b>             | 14.13                      | 3.88         | 13.16                                  | 3.85         |
|              | <b>C<sub>699</sub></b> | <b>OP2</b>             | 23.11                      | 3.86         | 9.17                                   | 3.87         |
| <b>4</b>     | <b>U<sub>700</sub></b> | <b>OP1</b>             | 7.78                       | 3.87         | 5.48                                   | 3.86         |
|              | <b>U<sub>700</sub></b> | <b>O3'</b>             | 0.05                       | 3.92         | 0.05                                   | 3.93         |
|              | <b>A<sub>701</sub></b> | <b>N7</b>              | ---                        | ---          | ---                                    | ---          |

## Supporting Script 1: Clustering command for analysis of restrained re-refined SLV simulations.

```
parm nowat.50mMNaCl.parm7
trajin nowat.nc
cluster c01 :1-17&!@H epsilon 1.0 sieve 5 out cnumvtime.dat
summary summary.dat info info.dat
```

## Supporting Script 2: Input file for simulated annealing.

```
Production run
&cntrl
  ntp = 500, ntwr = 500, ntwx = 500, ntwe = 500,
  ntf = 2, ntc = 2, ntb = 1, ntp = 0, nscm = 500,
  ntt = 3, ig=-1, gamma_ln=1.0,
  tautp = 0.5, taup = 5.0, cut = 9.0,
  nstlim = 2000000, dt = 0.002, iwrap = 1,
  irest = 0, ntx = 1, tol = 0.00000001,
  ioutfm=1,
  nmropt=1, pencut=-1, tempi=300.0,
/
&wt type = 'REST',
istep1=0,istep2=750000,value1=0.08,value2=0.08, /
&wt type = 'REST',
istep1=750001,istep2=1000000,value1=0.08,value2=1.0, /
&wt type = 'REST',
istep1=1000001,istep2=2000000,value1=1.0,value2=1.0, /
&wt type='TEMP0', istep1=0, istep2=500000, value1=300.0,
value2=700.0, /
&wt type='TEMP0', istep1=500001, istep2=1000000, value1=700.0,
value2=700.0, /
&wt type='TEMP0', istep1=1000001, istep2=2000000, value1=700.0,
value2=300.0, /
&wt type = 'END', /
  DISANG=../all.RST
  LISTOUT=POUT
&wt type='END', &end
END
```

## Supporting Script 3: Cpptraj command to separate MgBound and MgFree SLV simulation data < 2.5 Å RMSD to MgBound loop.

```
cpptraj << EOF
parm nowat.rna-ions.parm7
```

```
trajin nowat.rna-ions.nc
autoimage
readdata rmsd-1yn2-loop.dat name data
outtraj rmsmax_2.5.nc maxmin data:2 min 0.0 max 2.5
go
EOF
```

## Supporting Script 4: Clustering command for analysis of MgBound and MgFree SLV simulation data < 2.5 Å RMSD to MgBound loop.

```
cpptraj <<EOF
parm nowat.rna-ions.parm7
trajin rmsmax_2.5.nc
cluster kmeans clusters 2 rms mass :6-12@C*,N*,O*,P* sieve 10
out cvt.dat summary summary.dat clusterout cluster.nc clusterfmt
cdf repout rep repfmt pdb
EOF
```

## Supporting Script 5: Grid density analysis.

```
cpptraj << EOF
parm nowat.rna-ions.parm7
trajin cluster.c0.nc
autoimage origin
parm nowat.rna.parm7
reference average.c0.MGfree.noions.pdb parm nowat.rna.parm7
rms reference :1-17
#Calculate the histogram of MG ions in a 50x50x50Angstrom box,
with a grid spacing of 0.5Angstroms in x,y,z
#Isovalue is incremented every time a MG is within a grid space
#Density is calculated as number of ions/volume
grid grid_Na.c0.D.dx 100 0.5 100 0.5 100 0.5 :MG normdensity
density 0.00007135
EOF
```

## Supporting Script 6: Hbond analysis.

```
cpptraj << EOF
parm nowat.rna-ions.parm7
trajin cluster.c0.nc
hbond h1 dist 4.5 :1-17 solventdonor :Na+ solventacceptor :Na+
out allUV.dat avgout avg.dat solvout solv.dat bridgeout
bridge.dat
EOF
```
